# Supplementary material for: Facile one-pot green synthesis of Au–Ag alloy nanoparticles using sucrose and their composition-dependent photocatalytic activity for the reduction of 4-nitrophenol
Source: Royal Society of Chemistry journal article supplement (doi:10.1039/c7dt03850j), 2018-01-01
Supplement: c7dt03850j1.pdf [file c7dt03850j1.pdf]

## Supplementary information

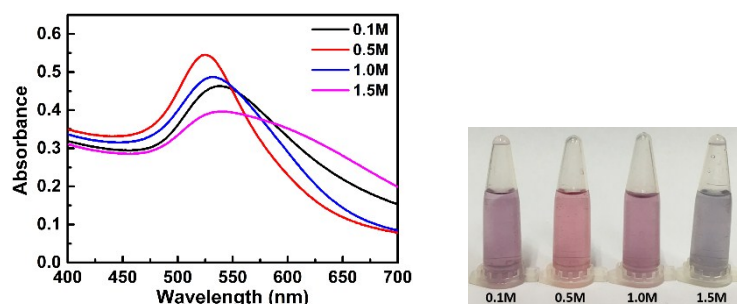

**Fig.S1** UV-vis spectra and photographs of Au NPs synthesized in sucrose solutions of different concentrations at 20 min. (25  $\mu$ L of 0.1 M chloroauric acid solution was added in 25 mL of boiling sucrose solution after the hydrolysis time of 10 min)

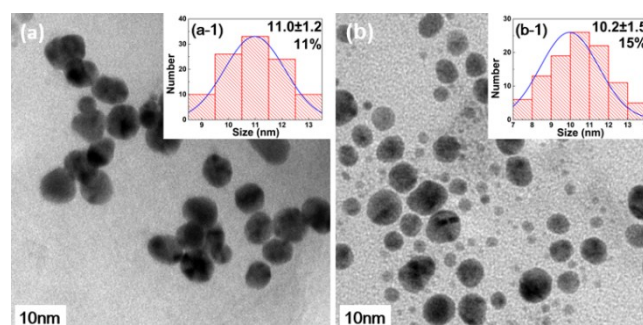

**Fig. S2** TEM images and size histograms (insets) of Au (a) and Ag (b) NPs synthesized in 0.5 M sucrose solution at 20 min. The average size of Ag NPs was obtained by the statistical calculation of NPs not smaller than 7 nm.

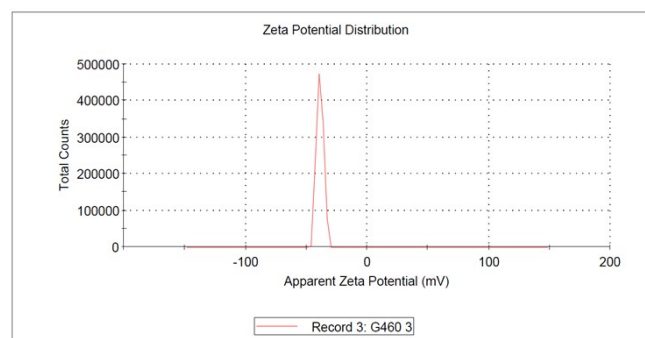

**Fig.S3** Zeta potential distribution of Au-Ag alloy NPs suspension synthesized in 0.5 M sucrose solution.

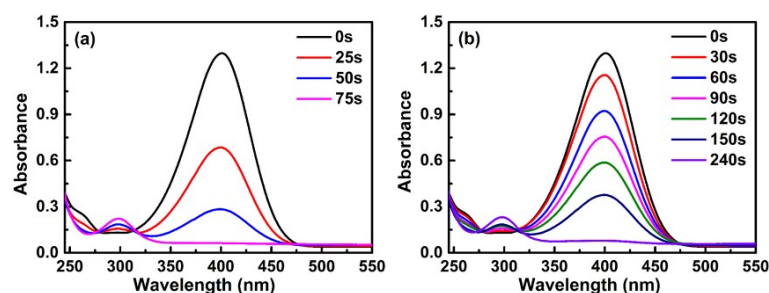

**Fig. S4** UV-vis absorption spectra for the reduction of 4-NP solution using 500  $\mu$ L of 0.1 mM Au (a) and Ag (b) NPs hydrosols as photocatalysts, respectively.
